# Supplementary material for: Global, regional, and national burden of hypertensive heart disease during 1990–2019: an analysis of the global burden of disease study 2019
Source: PubMed Central journal article supplement (PMC9044894; doi:10.1186/s12889-022-13271-0), 2022-04-27

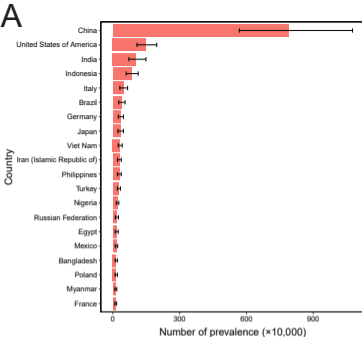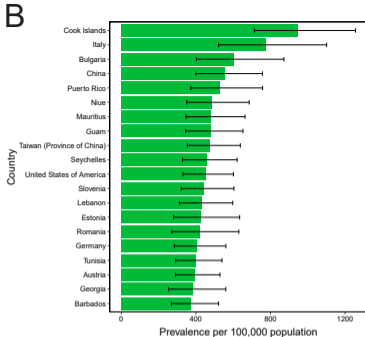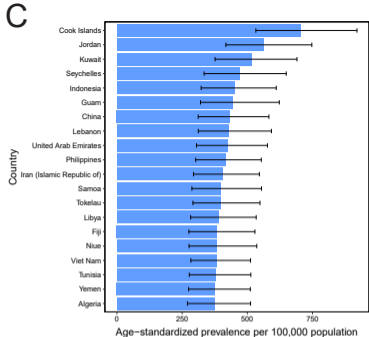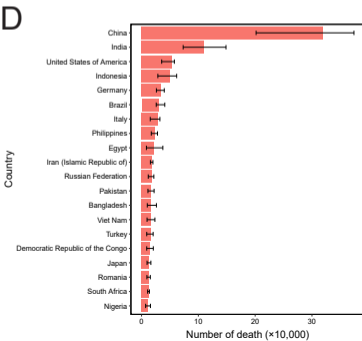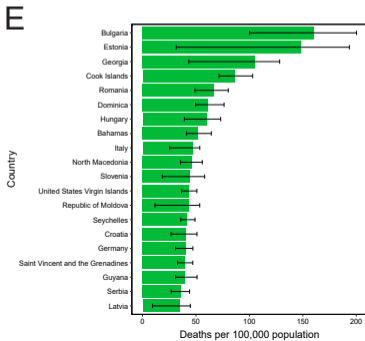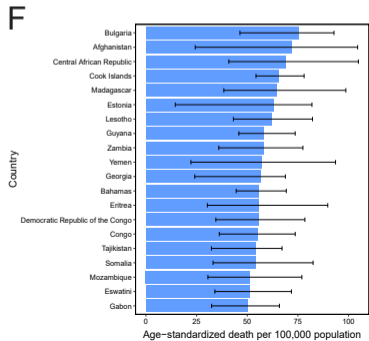

Supplement: 12889_2022_13271_MOESM2_ESM.pdf [file 12889_2022_13271_MOESM2_ESM.pdf]
