# Supplementary material for: Global, regional, and national burden of hypertensive heart disease during 1990–2019: an analysis of the global burden of disease study 2019
Source: Springer Nature journal article supplement (doi:10.1186/s12889-022-13271-0), 2022-04-27

**A**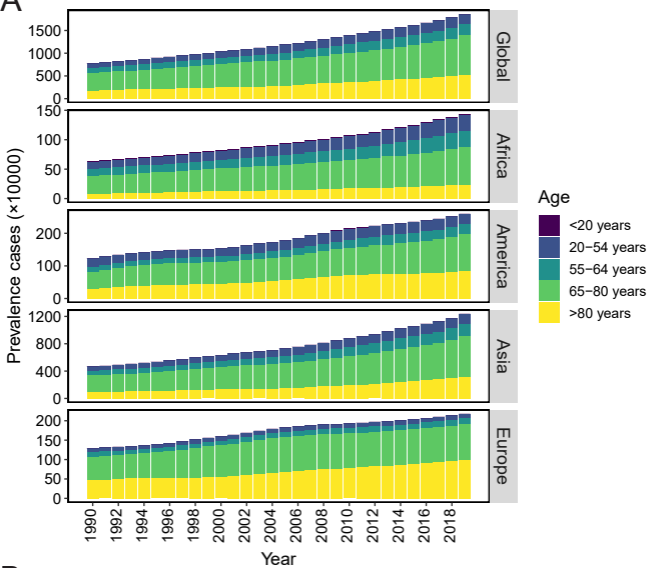**B**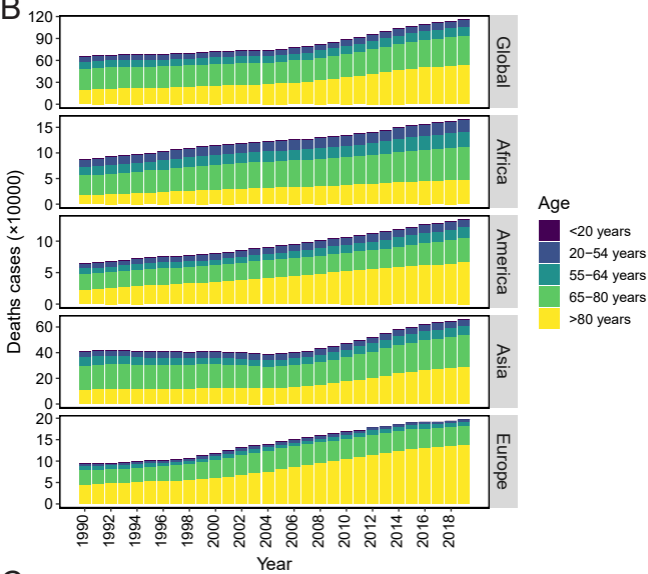**C**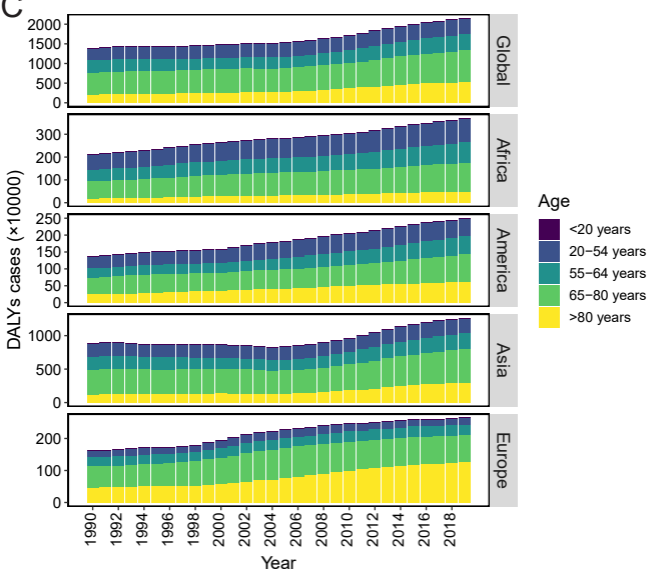

Supplement: MOESM1 [file 20349336]
