# Supplementary material for: Global, regional, and national burden of hypertensive heart disease during 1990–2019: an analysis of the global burden of disease study 2019
Source: BMC Public Health. 2022 Apr 27;22:841. doi: 10.1186/s12889-022-13271-0 (PMC9044894; doi:10.1186/s12889-022-13271-0)
Supplement: Supplementary file 5 — Additional file 5: Table S3. The global and regional age-standardized variation trends of hypertensive heart disease from 1990 to 2019. [file 12889_2022_13271_MOESM5_ESM.xlsx]

## Sheet: Sheet1
Table S3. The global and regional age-standardized variation trends of hypertensive heart disease from 1990 to 2019.
Sex	Both			Female			Male
	ASPR EAPC (95%UI)	ASDR EAPC (95%UI)	ASDALY EAPC (95%UI)	ASPR EAPC (95%UI)	ASDR EAPC (95%UI)	ASDALY EAPC (95%UI)	ASPR EAPC (95%UI)	ASDR EAPC (95%UI)	ASDALY EAPC (95%UI)
Global	0.17(0.15-0.18)	-0.74(-0.92--0.58)	-1.02(-1.19--0.86)	0.28(0.26-0.3)	-0.79(-0.93--0.65)	-1.14(-1.29--1.02)	0.02(0-0.04)	-0.72(-0.95--0.5)	-0.91(-1.11--0.71)
Low SDI	0.05(0.03-0.06)	-0.73(-0.82--0.64)	-0.94(-1.02--0.86)	-0.03(-0.05--0.01)	-0.8(-0.89--0.72)	-1.04(-1.12--0.97)	0.15(0.13-0.17)	-0.71(-0.82--0.6)	-0.86(-0.96--0.78)
Low-middle SDI	0.01(-0.01-0.04)	-1.02(-1.11--0.95)	-1.15(-1.25--1.07)	0.01(-0.02-0.03)	-1.23(-1.32--1.14)	-1.36(-1.47--1.27)	0.03(0-0.05)	-0.79(-0.88--0.71)	-0.93(-1.01--0.85)
Middle SDI	-0.24(-0.28--0.2)	-1.58(-1.98--1.2)	-1.74(-2.11--1.41)	-0.2(-0.25--0.15)	-1.85(-2.21--1.51)	-2.08(-2.41--1.79)	-0.29(-0.32--0.25)	-1.24(-1.69--0.81)	-1.39(-1.79--1)
High-middle SDI	0.46(0.39-0.52)	-0.51(-0.59--0.43)	-1.1(-1.15--1.06)	0.67(0.6-0.73)	-0.5(-0.57--0.43)	-1.16(-1.2--1.13)	0.12(0.05-0.19)	-0.59(-0.7--0.48)	-1.1(-1.18--1.03)
High SDI	-0.01(-0.12-0.1)	0.02(-0.14-0.19)	0.06(-0.13-0.26)	0.01(-0.1-0.11)	-0.11(-0.26-0.03)	-0.28(-0.46--0.11)	-0.03(-0.16-0.09)	0.18(-0.05-0.41)	0.34(0.11-0.57)
Africa	0.13(0.12-0.14)	-0.43(-0.53--0.33)	-0.71(-0.8--0.62)	0.03(0.01-0.05)	-0.48(-0.58--0.38)	-0.83(-0.92--0.74)	0.21(0.2-0.22)	-0.34(-0.44--0.24)	-0.55(-0.65--0.45)
America	-0.03(-0.13-0.07)	-0.22(-0.26--0.18)	-0.41(-0.47--0.35)	-0.04(-0.14-0.07)	-0.36(-0.4--0.33)	-0.71(-0.78--0.65)	-0.05(-0.15-0.06)	-0.08(-0.13--0.02)	-0.15(-0.23--0.07)
Asia	-0.22(-0.28--0.16)	-1.84(-2.26--1.46)	-1.89(-2.26--1.56)	-0.17(-0.24--0.09)	-2.06(-2.45--1.71)	-2.14(-2.48--1.85)	-0.27(-0.32--0.22)	-1.56(-2.01--1.14)	-1.62(-2.02--1.25)
Europe	0.11(-0.03-0.25)	0.9(0.68-1.12)	0.25(0.03-0.46)	0.25(0.12-0.39)	0.94(0.73-1.15)	0.18(-0.01-0.38)	-0.1(-0.25-0.05)	0.77(0.55-0.98)	0.26(0.03-0.48)
Oceania	0.04(0.01-0.07)	-0.27(-0.33--0.22)	-0.22(-0.29--0.16)	0(-0.04-0.03)	-0.45(-0.51--0.39)	-0.39(-0.46--0.33)	0.07(0.04-0.11)	-0.09(-0.15--0.03)	-0.07(-0.13-0)
Andean Latin America	0.43(0.37-0.49)	-0.53(-0.81--0.26)	-0.76(-1.06--0.47)	0.56(0.49-0.63)	-0.96(-1.19--0.73)	-1.26(-1.52--1)	0.33(0.26-0.4)	0.01(-0.33-0.35)	-0.18(-0.52-0.17)
Australasia	-0.94(-1.17--0.72)	-1.1(-1.42--0.8)	-1.41(-1.73--1.12)	-0.96(-1.16--0.76)	-1.1(-1.4--0.81)	-1.59(-1.91--1.3)	-0.8(-1.16--0.44)	-1(-1.39--0.62)	-1.16(-1.49--0.85)
Caribbean	-0.1(-0.12--0.09)	0.37(0.13-0.6)	0.2(0-0.39)	-0.08(-0.1--0.07)	-0.03(-0.27-0.21)	-0.19(-0.37-0)	-0.07(-0.1--0.05)	0.85(0.62-1.06)	0.61(0.4-0.82)
Central Asia	-0.49(-0.6--0.39)	2.25(1.78-2.67)	1.28(0.79-1.75)	-0.68(-0.77--0.59)	2.27(1.79-2.7)	1.22(0.72-1.69)	-0.35(-0.46--0.24)	2.17(1.71-2.57)	1.32(0.85-1.78)
Central Europe	-0.31(-0.43--0.2)	0.84(0.59-1.08)	0.35(0.13-0.57)	-0.41(-0.52--0.29)	0.59(0.38-0.81)	-0.03(-0.22-0.15)	-0.23(-0.36--0.1)	1.15(0.85-1.44)	0.73(0.46-1)
Central Latin America	-0.26(-0.3--0.22)	-2.07(-2.29--1.89)	-2.18(-2.44--1.98)	-0.37(-0.42--0.32)	-2.31(-2.57--2.1)	-2.5(-2.79--2.27)	-0.13(-0.17--0.09)	-1.8(-2--1.64)	-1.82(-2.04--1.64)
Central Sub-Saharan Africa	-0.09(-0.1--0.07)	-0.33(-0.43--0.24)	-0.6(-0.69--0.51)	-0.11(-0.13--0.09)	-0.41(-0.49--0.34)	-0.61(-0.7--0.52)	0.02(0-0.03)	-0.63(-0.71--0.54)	-0.81(-0.9--0.74)
East Asia	-0.34(-0.43--0.24)	-2.39(-3.21--1.63)	-2.68(-3.43--2)	-0.2(-0.3--0.1)	-2.75(-3.52--2.06)	-3.07(-3.77--2.47)	-0.49(-0.58--0.41)	-1.93(-2.81--1.09)	-2.27(-3.08--1.51)
Eastern Europe	-0.08(-0.19-0.03)	2.58(1.8-3.3)	1.6(0.8-2.38)	0.11(0-0.23)	2.53(1.77-3.22)	1.44(0.67-2.2)	-0.38(-0.48--0.27)	2.69(1.9-3.42)	1.82(0.99-2.62)
Eastern Sub-Saharan Africa	0.11(0.06-0.16)	-1.11(-1.19--1.04)	-1.48(-1.58--1.39)	0.03(-0.03-0.09)	-1.23(-1.34--1.13)	-1.63(-1.77--1.52)	0.23(0.18-0.28)	-1.08(-1.15--1.02)	-1.35(-1.44--1.28)
High-income Asia Pacific	-0.39(-0.46--0.32)	-3.54(-4.14--3.07)	-3.5(-4.07--3.06)	-0.42(-0.52--0.32)	-3.54(-4.11--3.1)	-3.73(-4.27--3.32)	-0.34(-0.39--0.29)	-3.82(-4.53--3.27)	-3.38(-4--2.88)
High-income North America	0.2(0.04-0.35)	0.81(0.74-0.87)	1(0.9-1.09)	0.23(0.08-0.38)	0.47(0.41-0.53)	0.56(0.48-0.62)	0.14(-0.05-0.33)	1.17(1.06-1.26)	1.31(1.18-1.42)
North Africa and Middle East	0.08(0.02-0.14)	-0.7(-0.79--0.61)	-0.89(-0.97--0.82)	0.32(0.22-0.41)	-0.79(-0.93--0.67)	-1.08(-1.16--1.01)	-0.13(-0.17--0.09)	-0.53(-0.63--0.43)	-0.67(-0.75--0.59)
South Asia	0.05(0.01-0.08)	-1.5(-1.68--1.35)	-1.47(-1.6--1.37)	0.01(0-0.02)	-1.76(-1.97--1.58)	-1.71(-1.87--1.58)	0.01(-0.05-0.08)	-1.31(-1.46--1.18)	-1.28(-1.39--1.18)
Southeast Asia	-0.01(-0.07-0.05)	-0.45(-0.55--0.37)	-0.47(-0.56--0.38)	-0.06(-0.13-0.01)	-0.7(-0.8--0.59)	-0.82(-0.94--0.71)	0.06(0-0.11)	-0.17(-0.25--0.09)	-0.12(-0.2--0.05)
Southern Latin America	-0.25(-0.44--0.05)	-0.07(-0.13-0)	-0.7(-0.8--0.61)	-0.39(-0.61--0.18)	0.03(-0.04-0.11)	-0.71(-0.81--0.6)	-0.07(-0.24-0.1)	-0.25(-0.31--0.19)	-0.73(-0.82--0.65)
Southern Sub-Saharan Africa	-0.45(-0.53--0.38)	0.31(-0.13-0.75)	-0.12(-0.6-0.35)	-0.6(-0.67--0.53)	0.27(-0.12-0.67)	-0.16(-0.56-0.23)	-0.23(-0.34--0.12)	0.25(-0.26-0.77)	-0.13(-0.71-0.46)
Tropical Latin America	-0.11(-0.17--0.05)	-1.76(-1.84--1.71)	-2.03(-2.12--1.98)	-0.04(-0.09-0.01)	-1.98(-2.07--1.93)	-2.26(-2.38--2.2)	-0.13(-0.2--0.06)	-1.48(-1.57--1.4)	-1.75(-1.84--1.7)
Western Europe	0(-0.15-0.15)	0.52(0.4-0.64)	-0.28(-0.39--0.17)	0.05(-0.09-0.19)	0.57(0.44-0.69)	-0.29(-0.4--0.19)	-0.07(-0.23-0.09)	0.47(0.34-0.6)	-0.27(-0.4--0.13)
Western Sub-Saharan Africa	0.3(0.25-0.35)	-0.04(-0.37-0.28)	-0.1(-0.4-0.2)	0.17(0.13-0.21)	-0.17(-0.47-0.12)	-0.34(-0.62--0.07)	0.39(0.33-0.45)	0.35(-0.09-0.79)	0.28(-0.11-0.67)
ASPR, age-standardized prevalence rate; ASDR, age-standardized death rate; DALY, disability adjusted life-year; EAPC, estimated annual percentage changes; SDI, socio-demographic index; UI, uncertainty interval
